# Supplementary material for: CD63+ and MHC Class I+ Subsets of Extracellular Vesicles Produced by Wild-Type and CD47-Deficient Jurkat T Cells Have Divergent Functional Effects on Endothelial Cell Gene Expression
Source: MDPI journal article supplement (doi:10.3390/biomedicines9111705), 2021-11-17

**Supplementary Figures:**

**Figure S1.** A) RNAs enriched in CD63<sup>+</sup> and MHC-I<sup>+</sup> EVs derived from WT Jurkat and JinB8 T cells. log2 total RPKM values show 618 transcripts present in CD63<sup>+</sup> WT EVs, while 1314 in CD63<sup>+</sup> JinB8 EVs respectively. Venn diagram showing overlap of 278 transcripts among total transcripts. B) log2 total RPKM values show 535 transcripts mapped in HUVEC treated with MHC-I<sup>+</sup> WT Jurkat EVs while 1414 in cells treated with MHC-I<sup>+</sup> JinB8 EVs, respectively. Venn diagram showing overlap of 384 transcripts among total transcripts. C&D) Types of RNAs between treatments with WT Jurkat CD63<sup>+</sup> vs JinB8 CD63<sup>+</sup> and WT Jurkat MHC-I<sup>+</sup> vs JinB8 MHC-I<sup>+</sup> based on small RNA data analysis aligned to the whole genome.

FigureS1

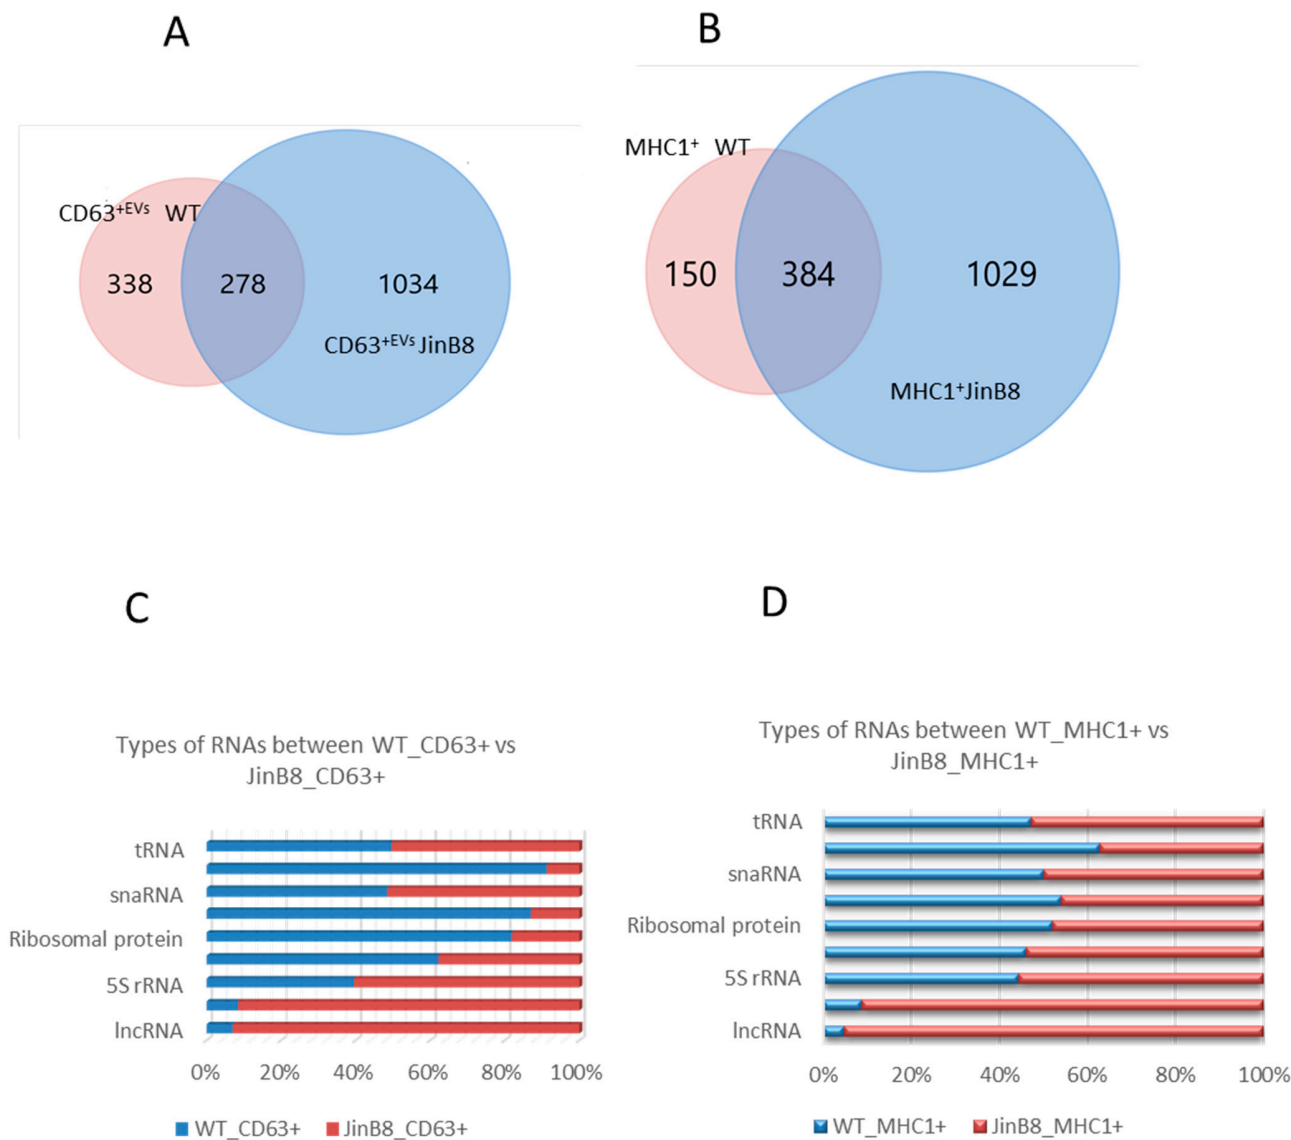

**Figure S2.** A&B) Hierarchical clustered of differentially expressed mRNA between HUVEC cells treated with WT Jurkat-derived MHC-I<sup>+</sup> and JinB8-derived MHC-I<sup>+</sup> EVs or CD63<sup>+</sup> and JinB8-derived CD63<sup>+</sup> EVs based on microarray analysis of HUVEC.

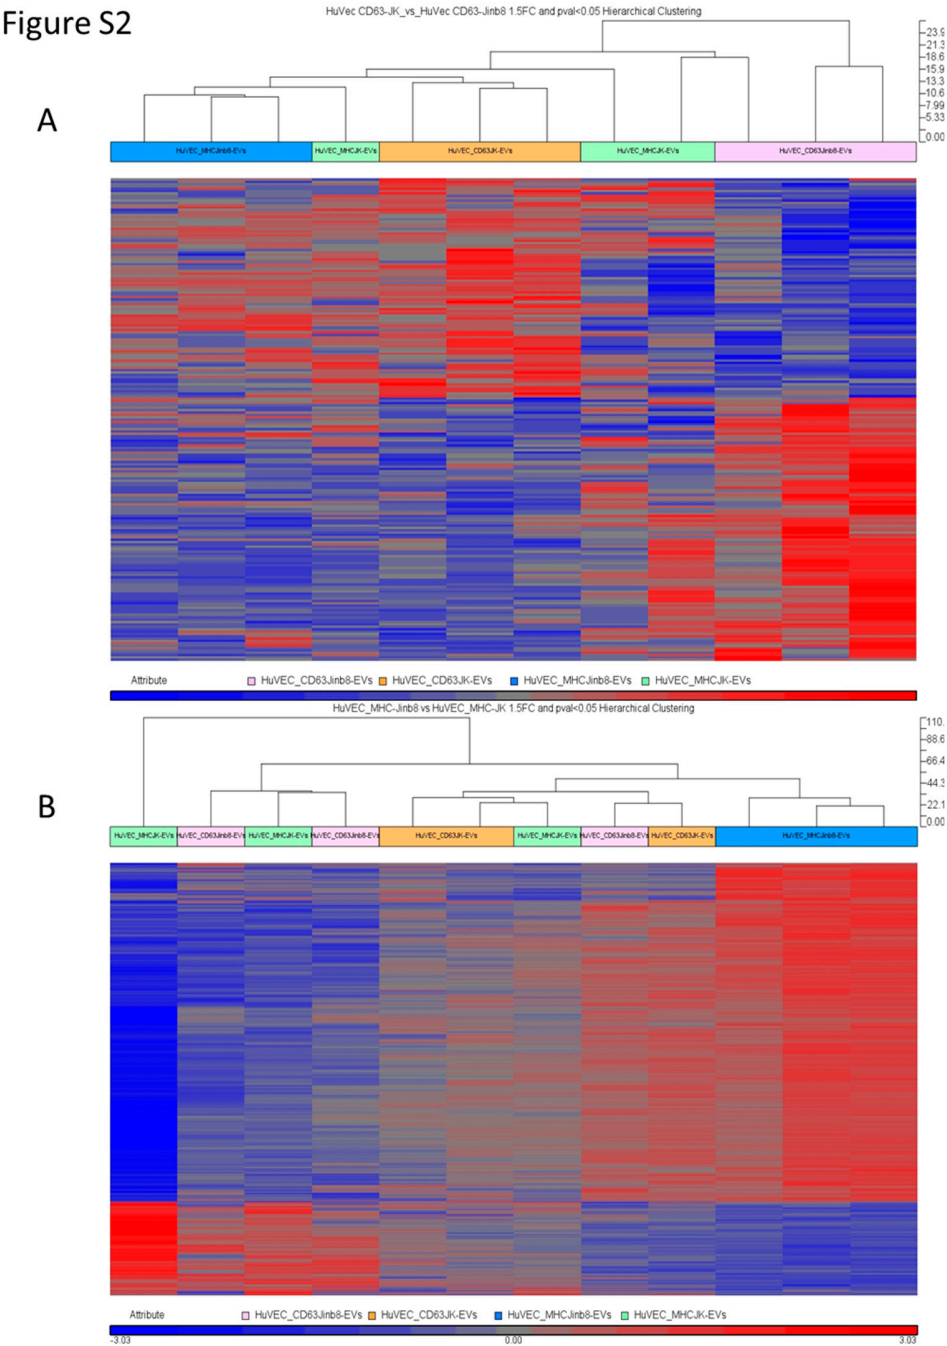

**Figure S3.** Validation of GSEA enrichment for EMT pathway. CD63<sup>+</sup> and MHC-I<sup>+</sup> EVs were extracted from WT Jurkat and JinB8 T cells and co-cultured with HUVEC for 3 days using beads as a control. mRNA expression of CTNNB1 ( $\beta$ -CATENIN), ZO-1, ZEB1, SLUG, SNAIL was analyzed using actin as control. A) Untreated vs Beads. B) WT Jurkat CD63<sup>+</sup> vs JinB8 CD63<sup>+</sup> and C) WT Jurkat MHC-I<sup>+</sup> vs JinB8 MHC-I<sup>+</sup>.

Figure S3

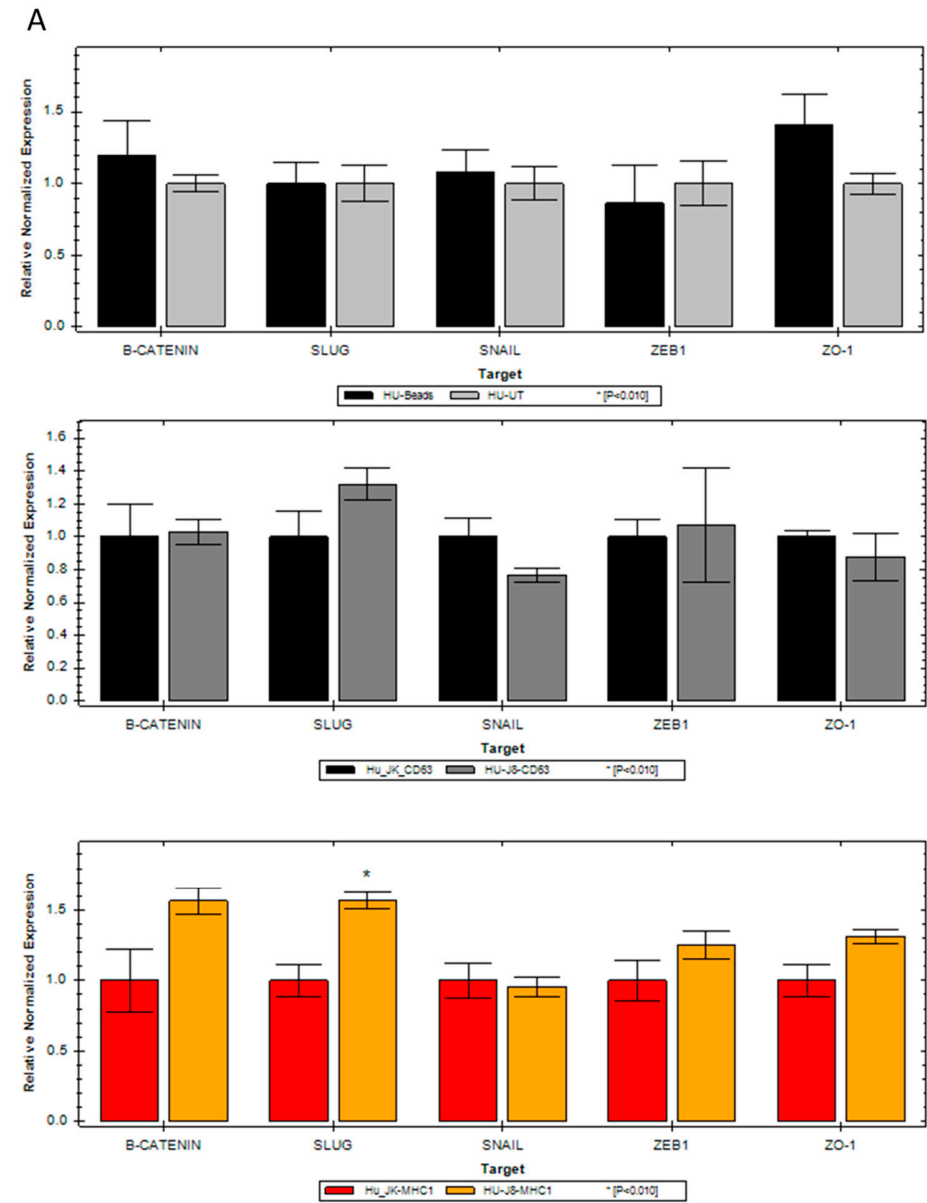

**Figure S4.** A&B) Validation of secreted TNF $\alpha$  in HUVEC treated with captured MHC-I<sup>+</sup> and depleted MHC-I<sup>-</sup> EVs from WT Jurkat and JinB8 T cells and co-cultured with HUVEC for 24-48 h.

Figure S4

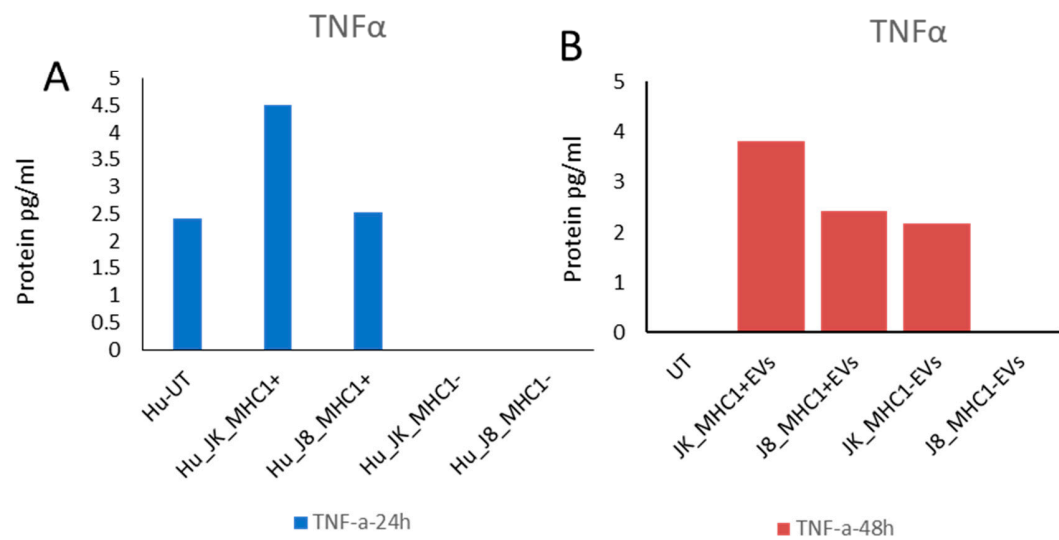

Supplement: s1 [file s1]
